# Supplementary material for: An ultrathin graphitic carbon nitride nanosheet: a novel inhibitor of metal-induced amyloid aggregation associated with Alzheimer's disease
Source: Royal Society of Chemistry journal article supplement (doi:10.1039/c6tb01215a), 2016-01-01
Supplement: c6tb01215a1.pdf [file c6tb01215a1.pdf]

Supporting Information

**Ultrathin Graphitic Carbon Nitride Nanosheet: A Novel Inhibitor of  
Metal-induced Amyloid Aggregation Associated with Alzheimer's Disease**

*Materials.* Dicyandiamide was purchased from Sigma-Aldrich. A $\beta$ 40 was obtained from American peptide. All these reagents were used as received without further purification. Deionized water (18.2 M $\Omega$  cm) used for all experiments was obtained from a Milli-Q system (Millipore, Bedford, MA).

*Apparatus and Characterization.* The samples were characterized by X-ray powder diffraction (XRD) with a Japan Rigaku Dmax X-ray diffractometer equipped with graphite monochromatized high-intensity Cu-K $\alpha$  radiation ( $\lambda=1.54178$  Å). Fluorescence spectra were carried out on a JASCO FP-6500 spectrofluorometer. All spectra were recorded in a 1.0 cm path length cell. AFM measurements were performed using Nanoscope V multimode atomic force microscope (Veeco Instruments, USA). TEM images were recorded using a FEI TECNAI G2 20 high-resolution transmission electron microscope operating at 200 kV. X-ray photoelectron spectra (XPS) were acquired on an ESCALab220i-XL electron spectrometer from VG Scientific using 300W Al K $\alpha$  as the excitation source. The binding energies obtained in the XPS spectral analysis were corrected for specimen charging by referencing C1s to 284.8 eV.

*Preparation of bulk g-C<sub>3</sub>N<sub>4</sub>.* The bulk g-C<sub>3</sub>N<sub>4</sub> was prepared by thermal polycondensation of dicyandiamide. In a typical synthesis, 10 g dicyandiamide was

put into a crucible with a cover and calcined at settled temperatures for 4 h in a muffle furnace, using a heating rate of  $2.3\text{ }^{\circ}\text{C min}^{-1}$ . The sample was then allowed to cool to room temperature before removal from the furnace. Yellow products were obtained after this polycondensation step.

*Preparation of ultrathin g-C<sub>3</sub>N<sub>4</sub> nanosheets.* The ultrathin g-C<sub>3</sub>N<sub>4</sub> nanosheets were obtained by liquid exfoliating of as-prepared bulk g-C<sub>3</sub>N<sub>4</sub> in water. In detail, 100 mg of bulk g-C<sub>3</sub>N<sub>4</sub> powder dispersed in 100 mL water, and then ultrasound for about 16 hours. The initial formed suspension was then centrifuged at about 5000 rpm to remove the residual unexfoliated g-C<sub>3</sub>N<sub>4</sub> nanoparticles and large-area nanosheets before used for further study.

*A $\beta$  Preparation.* A $\beta$ 40 (lot no. U10012) was purchased from American Peptide and prepared as previously described. Briefly, the powered A $\beta$  peptide was first dissolved in 1,1,1,3,3,3-hexafluoro-2-propanol (HFIP) at the concentration of 1 mg/ml. The solution was shaking at  $4\text{ }^{\circ}\text{C}$  for 2 hours in a sealed vial for further dissolution and was then stored at  $-20\text{ }^{\circ}\text{C}$  as a stock solution. Before use, the solvent HFIP was removed by evaporation under a gentle stream of nitrogen and peptide was dissolved in water. Cu<sup>2+</sup> induced aggregation of A $\beta$ 40 was accomplished by mixing an aliquot of the peptides and CuCl<sub>2</sub> at a molar ratio of 1:1 into 10 mM HEPES (150 mM NaCl, pH 6.6) at  $37\text{ }^{\circ}\text{C}$  for 24 h. For inhibition experiment, A $\beta$ 1-40 peptides and Cu<sup>2+</sup> were aged with or without g-C<sub>3</sub>N<sub>4</sub>. While for the disaggregation experiment, the sample of aged A $\beta$ 40-Cu<sup>2+</sup> was mixed with g-C<sub>3</sub>N<sub>4</sub>, which followed by further incubation of 4h.

*Native Polyacrylamide Gel Electrophoresis.* Native polyacrylamide gel

electrophoresis (PAGE) was carried out using a 12% gel. Gels were run in a Tris/Tricine system after which the gels were silver-stained.

*Transmission Electron Microscopy.* Samples (10  $\mu\text{L}$ ) were spotted onto carbon-coated copper grids for 30 min. The grids were blotted with filter paper to remove excess buffer and the sample was stained with 1.5% (w/v) phosphotungstic acid (pH 7.4). Grids were blotted again and air-dried before analysis on a transmission electron microscope, operating with a voltage of 100 kV.

*Atomic Force Microscopy.* AFM measurements were performed using a Nanoscope V multimode atomic force microscope (Veeco Instruments, USA). Samples for AFM images were diluted with deionized  $\text{H}_2\text{O}$  to yield a final concentration of  $1 \times 10^{-6}$  M. The sample (20  $\mu\text{L}$ ) was then applied onto freshly cleaved muscovite mica and allowed to dry. Tapping mode was used to acquire the images under ambient conditions.

*Intracellular determination of ROS.* The generation of reactive oxygen radicals was monitored using 2', 7'-dichlorofluorescein diacetate (DCFH-DA). This dye is a nonfluorescent compound which readily diffuses into cells and reacts with intracellular free radicals. The product, dichlorofluorescein (DCF), is a fluorophor. The DCF fluorescence intensity correlates with the amount of intracellular reactive oxygen radicals. To perform the test, DCFH-DA solution (20  $\mu\text{M}$ ) was added to the cells, and the mixture was incubated at 37  $^\circ\text{C}$  for 1 h. The cells were then washed twice with PBS and finally, the fluorescence intensity was monitored on a fluorescence spectrofluorometer with excitation and emission wavelengths of 488 and

525 nm, respectively.

*Cell Toxicity Assays.* PC12 cells (rat pheochromocytoma, American Type Culture Collection) were cultured in DMEM (Gibco BRL) medium supplemented with 5% fetal bovine serum (FBS), 10% horse serum (HS) in a 5% CO<sub>2</sub> humidified environment at 37 °C. Prior to differentiation of PC12 cell, a well plate was coated with collagen type I (0.5 mg/mL) overnight. PC12 was seeded at a density of 5000 cells/cm<sup>2</sup> for MTT (3-(4,5-dimethylthiazol-2-yl)-2,5-diphenyltetrazolium bromide, Sigma-Aldrich) assay to minimize contact inhibition of neuritogenesis and incubated for 7 days in serum-reduced media (1% HS and 0.5% FBS) supplemented with 50 ng/mL NGF. After the cell differentiated, A $\beta$ 40 (5  $\mu$ M), CuCl<sub>2</sub> (5  $\mu$ M) and chelator were added. 48 hours later, the cells were treated with 10  $\mu$ L MTT (5 mg/mL in PBS) for 4 h at 37 °C and then were lysed in DMSO for 10 min at room temperature in the dark. Absorbance values of formazan were determined at 570 nm with a Bio-Rad model-680 microplate reader.

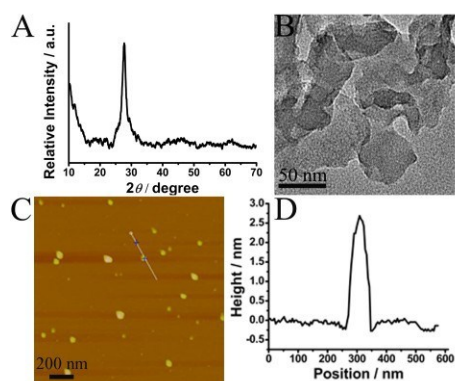

Figure S1 (A) X-ray diffraction pattern of g-C<sub>3</sub>N<sub>4</sub> nanosheets. (B) TEM images of the as-synthesized g-C<sub>3</sub>N<sub>4</sub> nanosheets. (C) AFM image of thus obtained g-C<sub>3</sub>N<sub>4</sub>

nanosheets and (D) The height of g-C<sub>3</sub>N<sub>4</sub>.

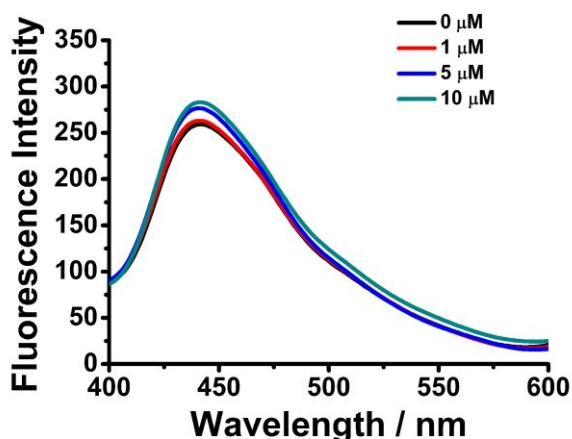

Figure S2 The effect of Aβ<sub>40</sub> on the fluorescence of g-C<sub>3</sub>N<sub>4</sub> nanosheet.

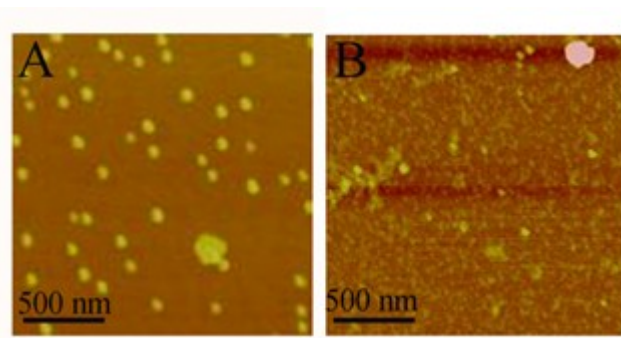

Figure S3 Determination of the inhibition effects of g-C<sub>3</sub>N<sub>4</sub> nanosheets on the Cu<sup>2+</sup>-induced formation of Aβ<sub>40</sub> aggregates by AFM: (A) Aβ<sub>40</sub>-Cu<sup>2+</sup> complex, (B) Aβ<sub>40</sub>-Cu<sup>2+</sup> complex with g-C<sub>3</sub>N<sub>4</sub>. [Aβ<sub>40</sub>] = 10 μM, [Cu<sup>2+</sup>] = 10 μM, [g-C<sub>3</sub>N<sub>4</sub>] = 20 μgml<sup>-1</sup>. Buffer: 10 mM HEPES, 150 mM NaCl, pH 6.6.

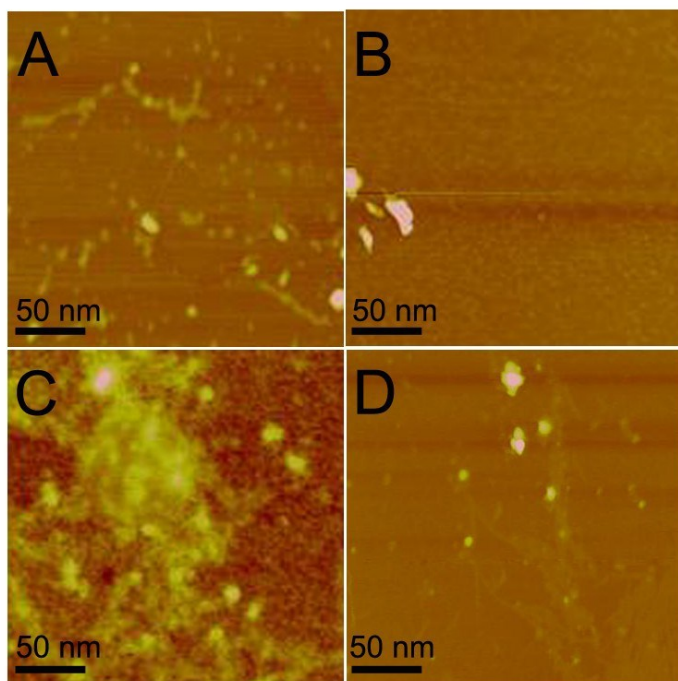

Figure S4 Determination of the inhibition effects of g-C<sub>3</sub>N<sub>4</sub> nanosheets on the Cu<sup>2+</sup>-induced formation of Aβ40 aggregates at different Cu<sup>2+</sup>:Aβ40 ratios: (A) Aβ40-Cu<sup>2+</sup> complex at a 0.1:1 molar Cu<sup>2+</sup>:Aβ40 ratio, (B) Aβ40-Cu<sup>2+</sup> complex with g-C<sub>3</sub>N<sub>4</sub> at a 0.1:1 molar Cu<sup>2+</sup>:Aβ40 ratio. (C) Aβ40-Cu<sup>2+</sup> complex at a 5:1 molar Cu<sup>2+</sup>:Aβ40 ratio, (D) Aβ40-Cu<sup>2+</sup> complex with g-C<sub>3</sub>N<sub>4</sub> at a 5:1 molar Cu<sup>2+</sup>:Aβ40 ratio. [Aβ40] = 10 μM, [g-C<sub>3</sub>N<sub>4</sub>] = 20 μgml<sup>-1</sup>. Buffer: 10 mM HEPES, 150 mM NaCl, pH 6.6. At a 0.1:1 molar Cu<sup>2+</sup>:Aβ40 ratio, spherical aggregates and a few fibrillar structures were observed in Aβ-Cu<sup>2+</sup> complex sample under our incubation condition. However, in the presence of g-C<sub>3</sub>N<sub>4</sub> nanosheets, the fibrillar structures and spherical aggregates almost disappeared, indicating the g-C<sub>3</sub>N<sub>4</sub> nanosheets could chelate the Cu<sup>2+</sup> ions and inhibit Cu<sup>2+</sup>-induced aggregation of Aβ40 at subequimolar Cu<sup>2+</sup>:Aβ40 ratio. On the other hand, at a 5:1 molar Cu<sup>2+</sup>:Aβ40 ratio, some spherical aggregates were found in Aβ-Cu<sup>2+</sup> complex sample. Upon co-incubation with g-C<sub>3</sub>N<sub>4</sub> nanosheets,

A $\beta$ -Cu<sup>2+</sup> complexes were promoted to form fibrillar structures. The detailed mechanism behind the inhibition effects will be discussed in our future work.

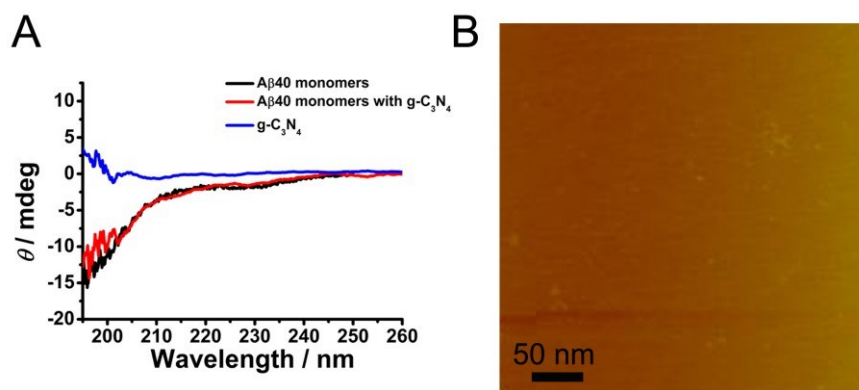

Figure S5 (A) Circular dichroism spectra of A $\beta$ 40 at the start of the experiment with or without g-C<sub>3</sub>N<sub>4</sub> nanosheets. (B) AFM image of A $\beta$ 40 at the start of the experiment.

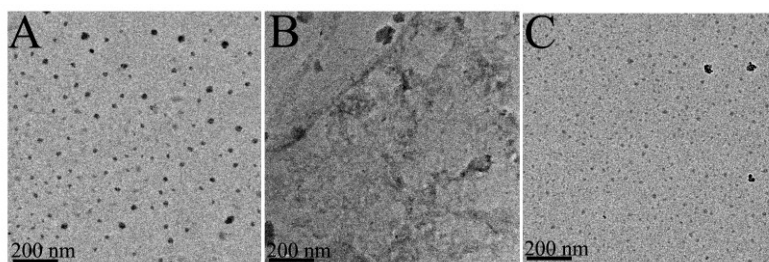

Figure S6 Disassociation of A $\beta$ 40-Cu<sup>2+</sup> aggregates by g-C<sub>3</sub>N<sub>4</sub> nanosheets. TEM images of samples of (A) A $\beta$ 40-Cu<sup>2+</sup> aggregates, (B) the performed A $\beta$ 40-Cu<sup>2+</sup> aggregates treated with g-C<sub>3</sub>N<sub>4</sub> for 4hs, (C) the performed A $\beta$ 40-Cu<sup>2+</sup> aggregates treated with CQ for 4hs. [A $\beta$ 40] = 10  $\mu\text{M}$ , [Cu<sup>2+</sup>] = 10  $\mu\text{M}$ , [g-C<sub>3</sub>N<sub>4</sub>] = 20  $\mu\text{gml}^{-1}$ , [CQ] = 20  $\mu\text{gml}^{-1}$ .

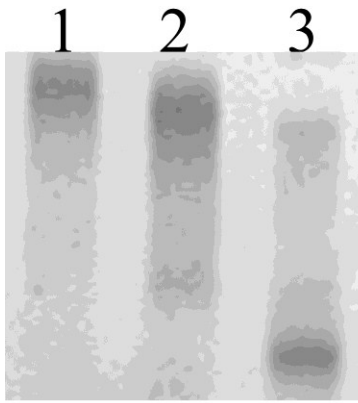

Figure S7 Determination of the disassociation effects of  $g\text{-C}_3\text{N}_4$  on the  $\text{Cu}^{2+}$ -induced formation of  $\text{A}\beta_{40}$  aggregates by native-PAGE: (1)  $\text{A}\beta_{40}\text{-Cu}^{2+}$  complex, (2) the performed  $\text{A}\beta_{40}\text{-Cu}^{2+}$  aggregates treated with  $2 \mu\text{gml}^{-1}$   $g\text{-C}_3\text{N}_4$ , (3) the performed  $\text{A}\beta_{40}\text{-Cu}^{2+}$  aggregates treated with  $20 \mu\text{gml}^{-1}$   $g\text{-C}_3\text{N}_4$ ,  $[\text{A}\beta_{40}] = 10 \mu\text{M}$ ,  $[\text{Cu}^{2+}] = 10 \mu\text{M}$ . Buffer: 10 mM HEPES, 150 mM NaCl, pH 6.6.

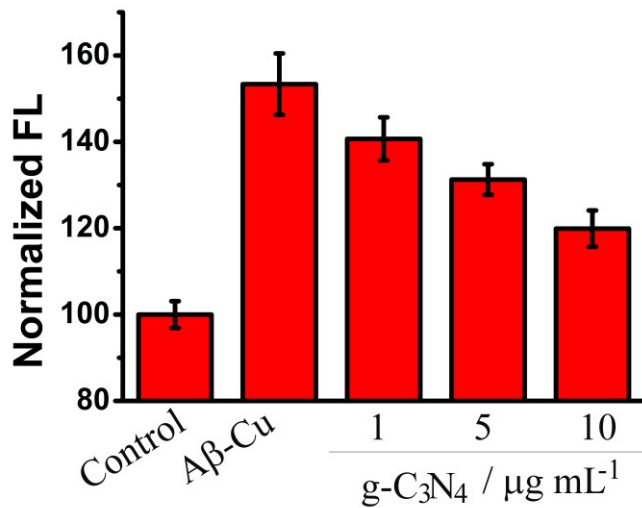

Figure S8 Cells were treated with aged  $\text{A}\beta_{40}\text{-Cu}^{2+}$  disassociated with or without  $g\text{-C}_3\text{N}_4$  nanosheets and ROS generation inside the cells after 24 h was measured using DCF fluorescence. Data represents mean  $\pm$  SEM of at least three different experiments. Control:  $\text{A}\beta_{40}\text{-Cu}^{2+}$ -untreated cells,  $[\text{A}\beta_{40}] = 5 \mu\text{M}$ ,  $[\text{Cu}^{2+}] = 5 \mu\text{M}$ .



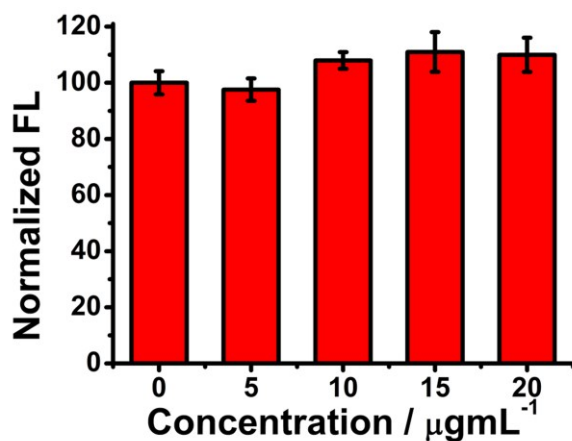

Figure S9 Effects of the g-C<sub>3</sub>N<sub>4</sub> nanosheets on the production of ROS in PC12 cells.

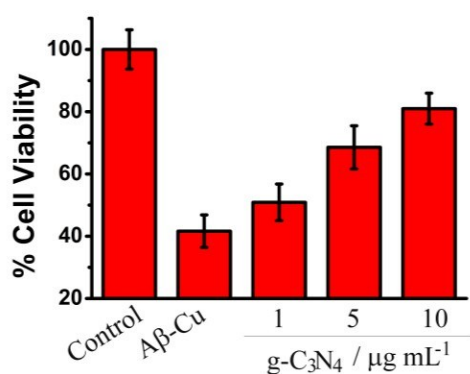

Figure S10 Protection effects of g-C<sub>3</sub>N<sub>4</sub> nanosheets on A $\beta$ 40-Cu<sup>2+</sup>-induced cytotoxicity of differentiated PC12 cells in the disaggregation study. Cell viability was determined using the MTT method and data points shown are the mean values  $\pm$ SEM from three independent experiments. Control: A $\beta$ 40-Cu<sup>2+</sup>-untreated cells, [A $\beta$ 40] = 5  $\mu\text{M}$ , [Cu<sup>2+</sup>] = 5  $\mu\text{M}$ .

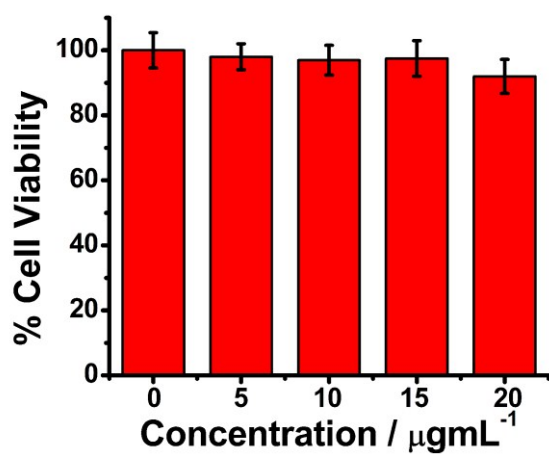

Figure S11 Effects of the g-C<sub>3</sub>N<sub>4</sub> nanosheets on differentiated PC12 cell viability determined by MTT method.
